# Supplementary material for: TAp73 Inhibits EMT and Cell Migration in Pancreatic Cancer Cells Through Promoting SMAD4 Expression and SMAD4 Dependent Inhibition of ERK Activation
Source: Preprints.org preprint supplement (doi:10.20944/preprints202306.1910.v1), 2023-06-27
Supplement: Supplementary file 2 [file supplementary]

Archive with 2 entries (2 files):
- cancers-2490508-supplementary.pdf
- cancers-2490508 - File S1.pdf
