# Supplementary material for: TAp73 Inhibits EMT and Cell Migration in Pancreatic Cancer Cells Through Promoting SMAD4 Expression and SMAD4 Dependent Inhibition of ERK Activation
Source: Preprints.org preprint supplement (doi:10.20944/preprints202306.1910.v1), 2023-06-27
Supplement: Supplementary file 2 [file supplementary › cancers-2490508 - File S1.pdf]

# Uncropped blots from Figure 1

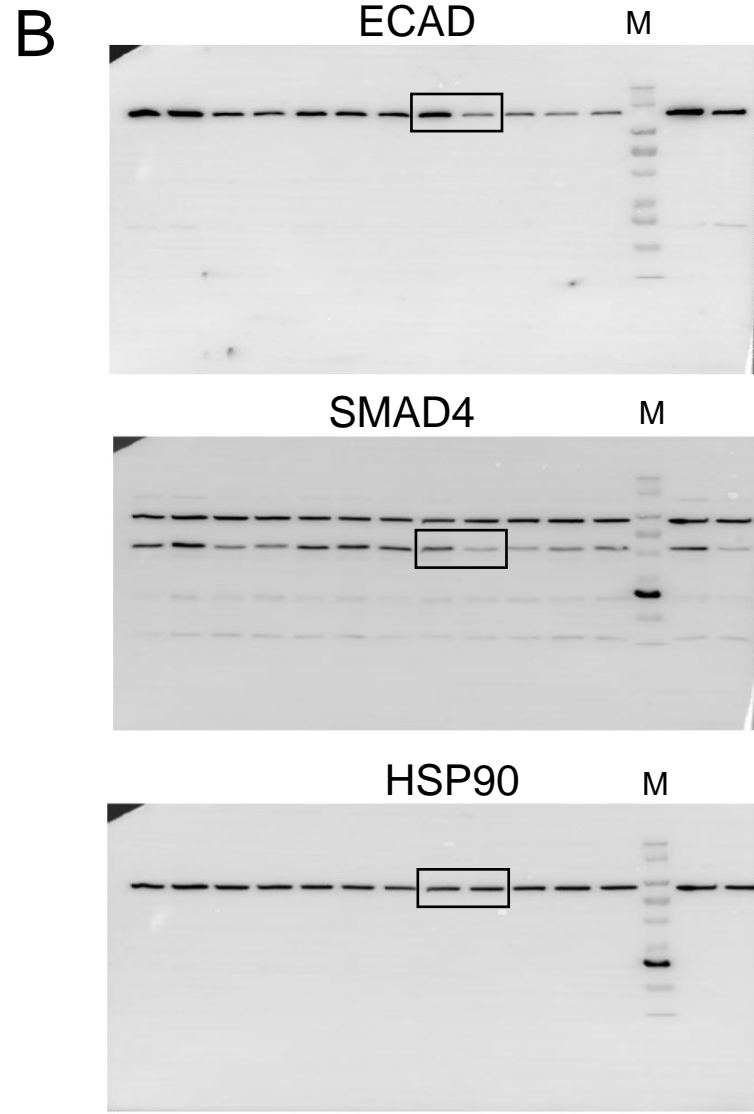

**C**

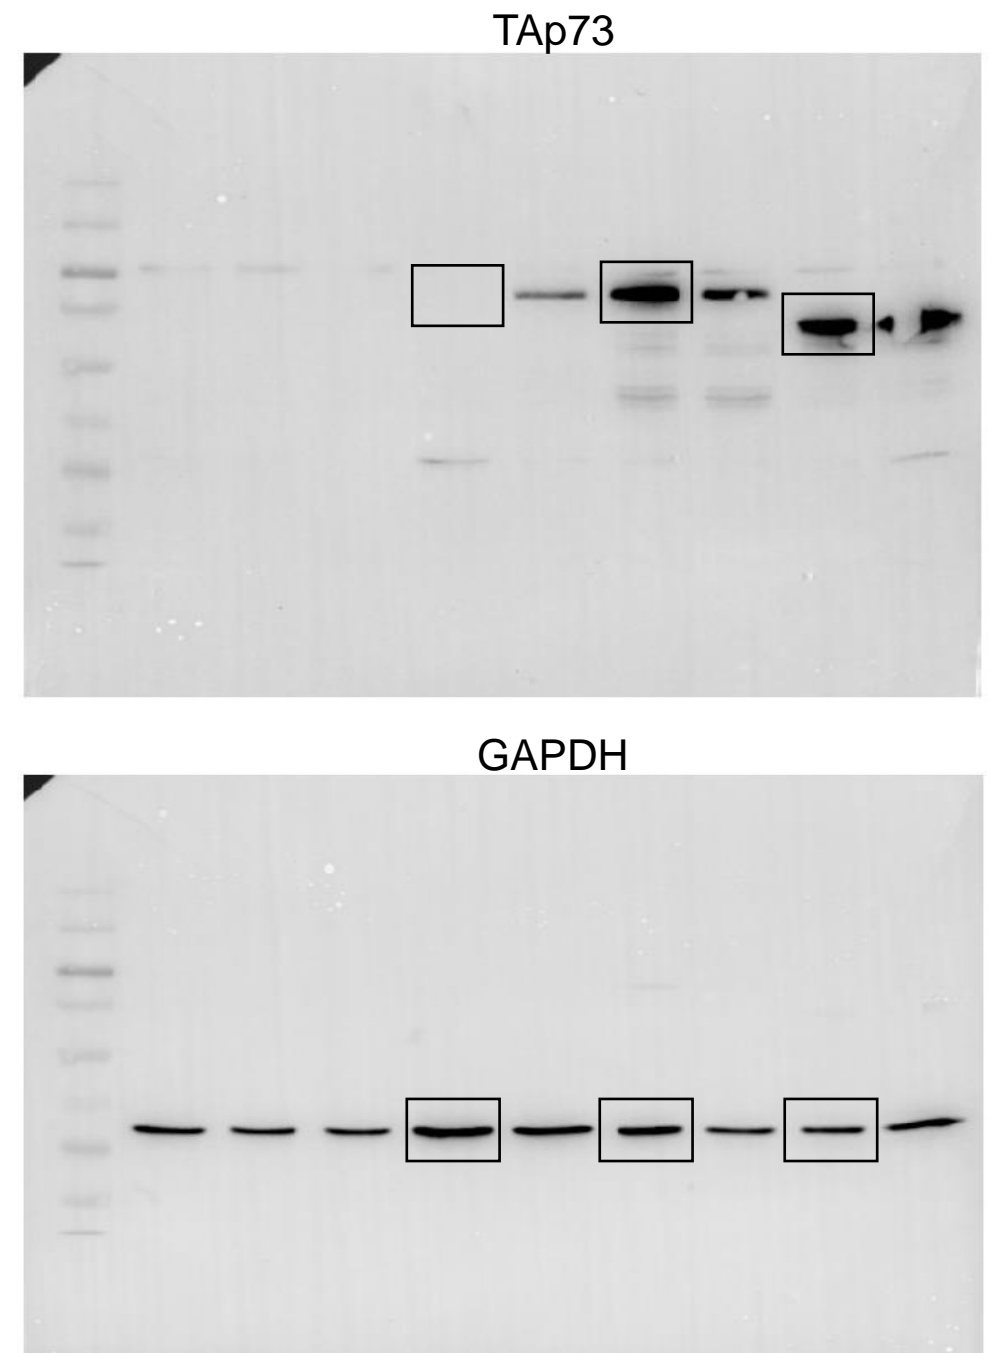

Figure legend: M = molecular weight marker (SM1841, Fermentas/Thermo Fisher Scientific) The boxed bands indicate those in the main figure

# Uncropped blots from Figure 2C

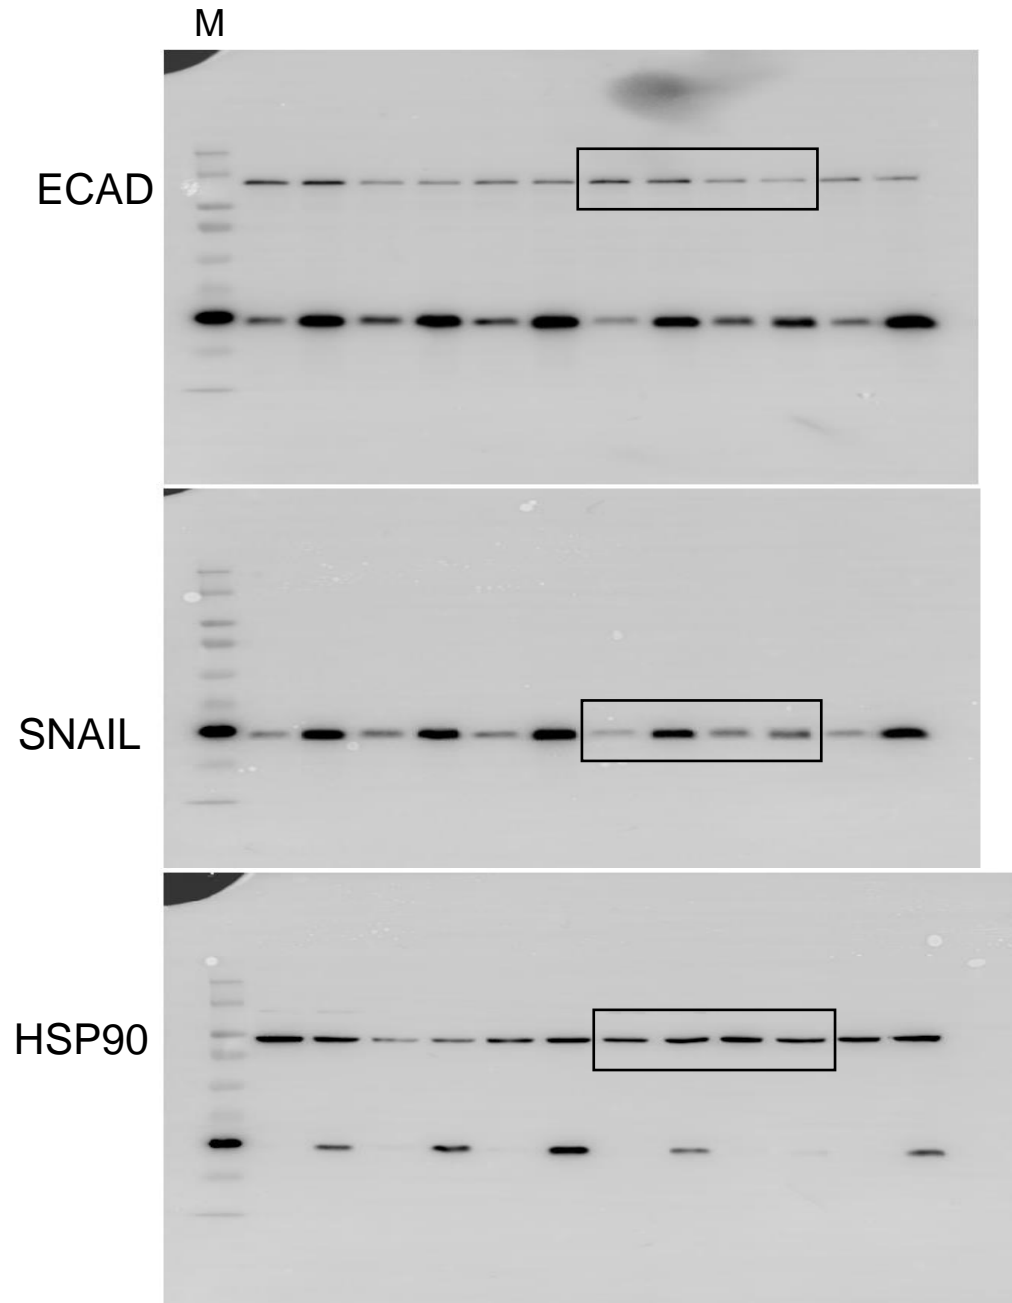

The boxed bands indicate those in the main figure

Figure legend: M = molecular weight marker  
(SM1841, Fermentas/Thermo Fisher Scientific)

# Uncropped blots from Figure 3

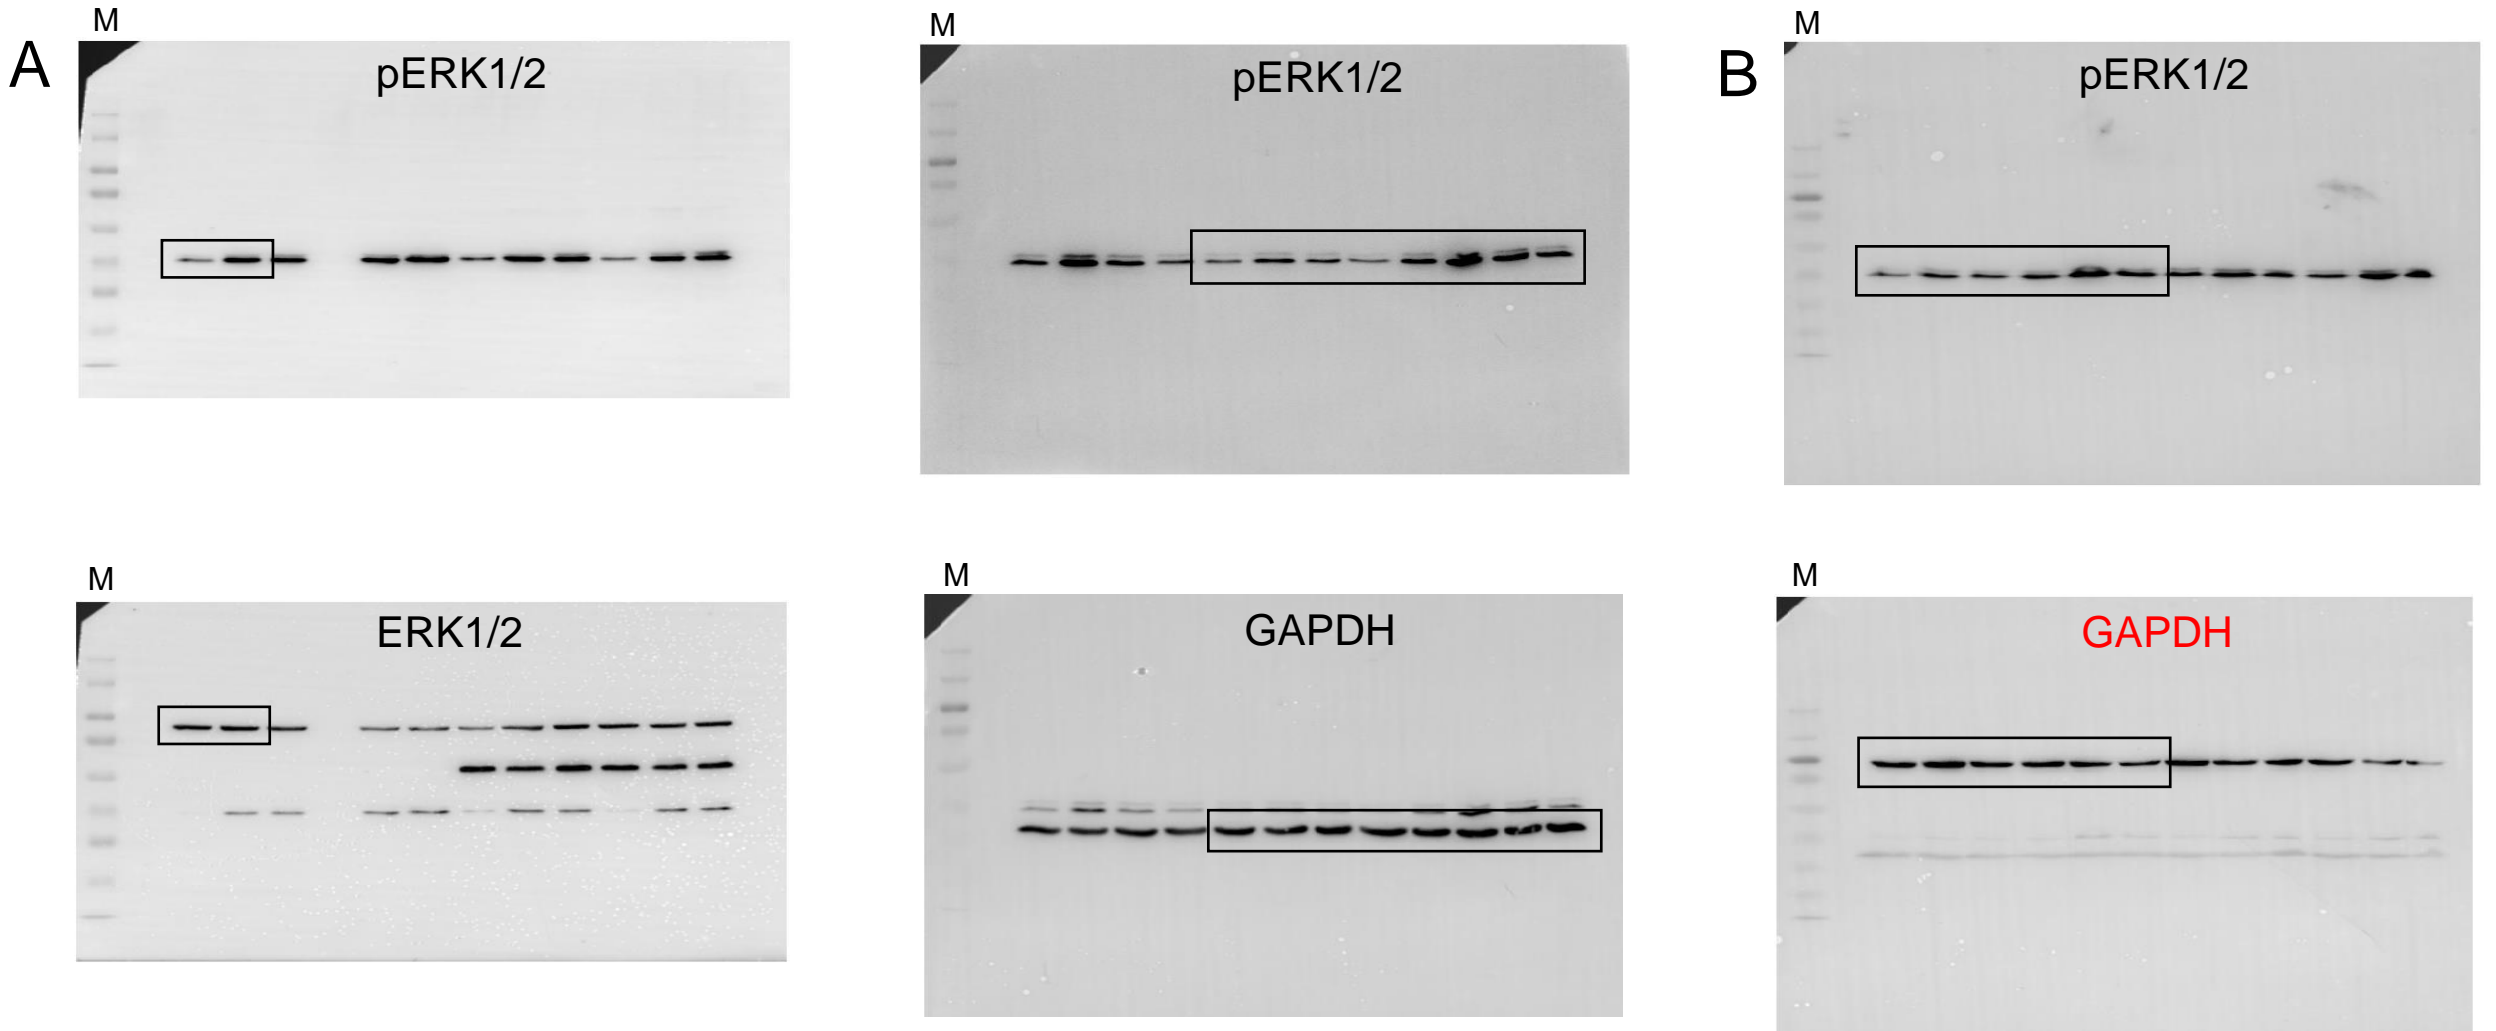

Figure legend: M = molecular weight marker  
(SM1841, Fermentas/Thermo Fisher Scientific)

The boxed bands indicate those in the main figure

## Uncropped blots from Figure 4

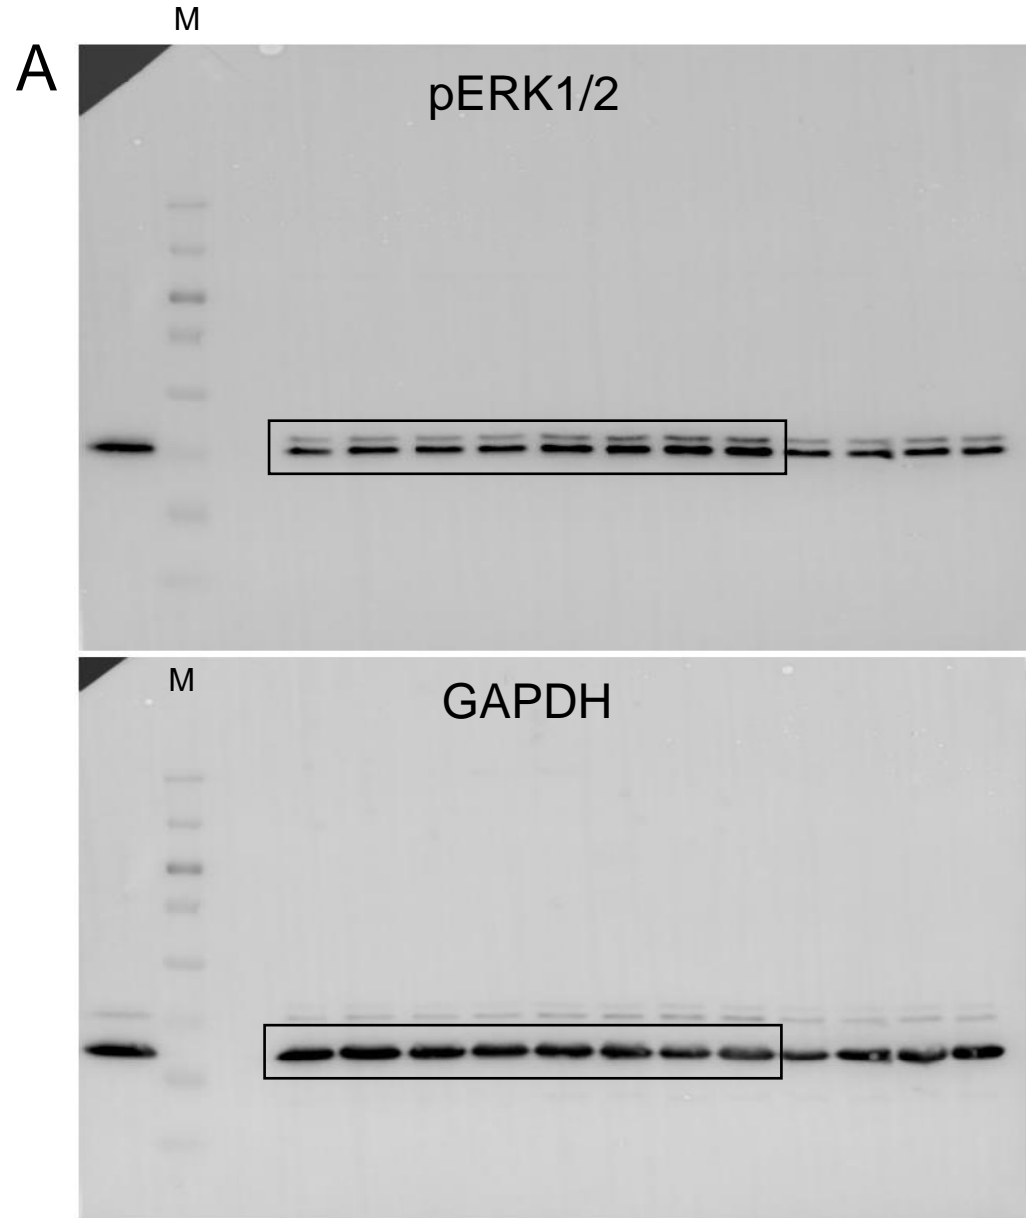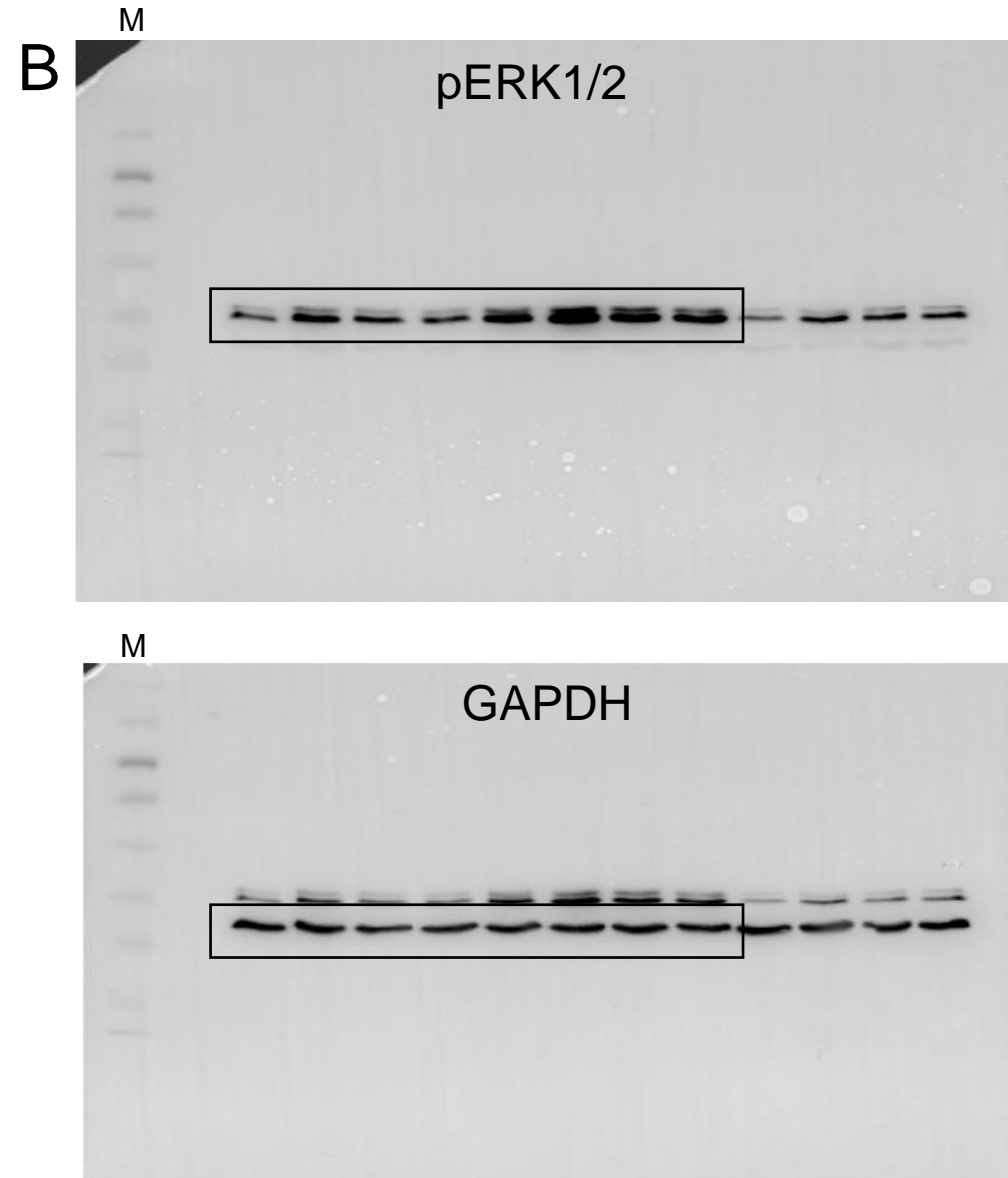

Figure legend: M = molecular weight marker  
(SM1841, Fermentas/Thermo Fisher Scientific)

The boxed bands indicate those in the main figure

# Uncropped blots from Figure 4

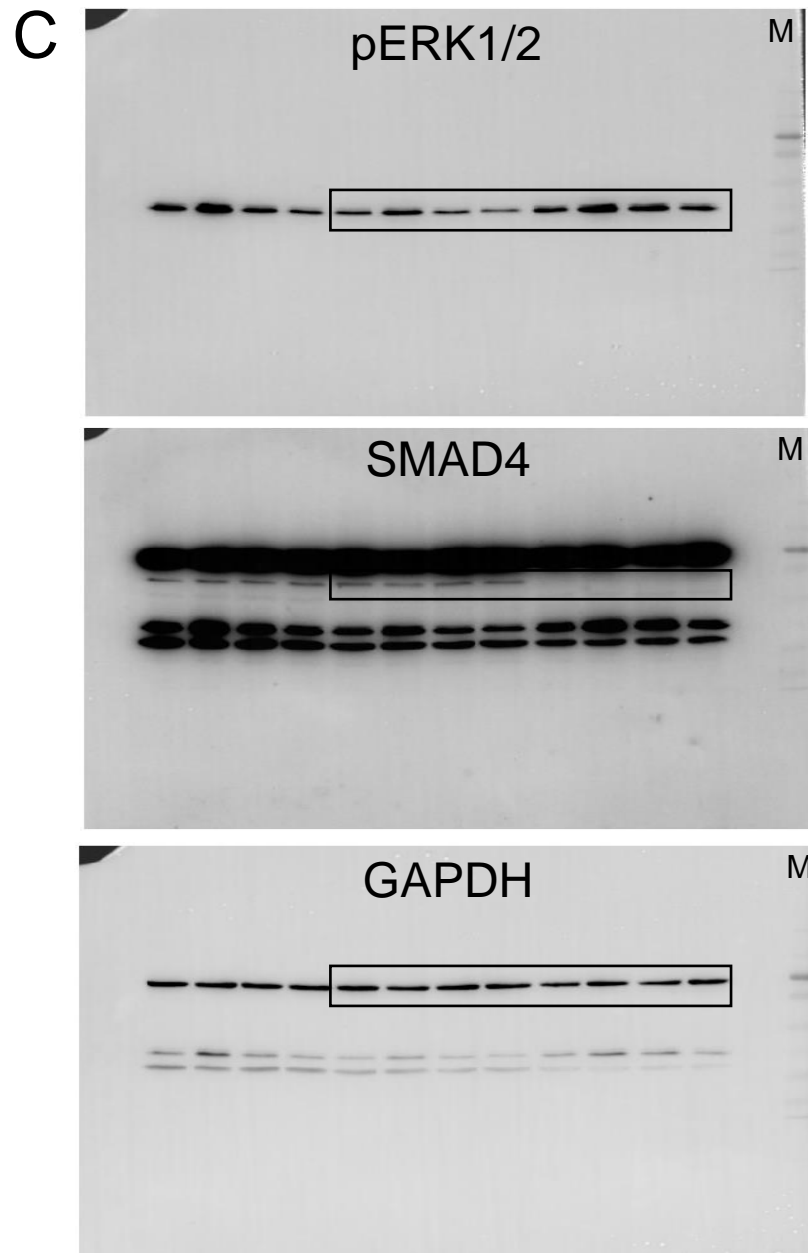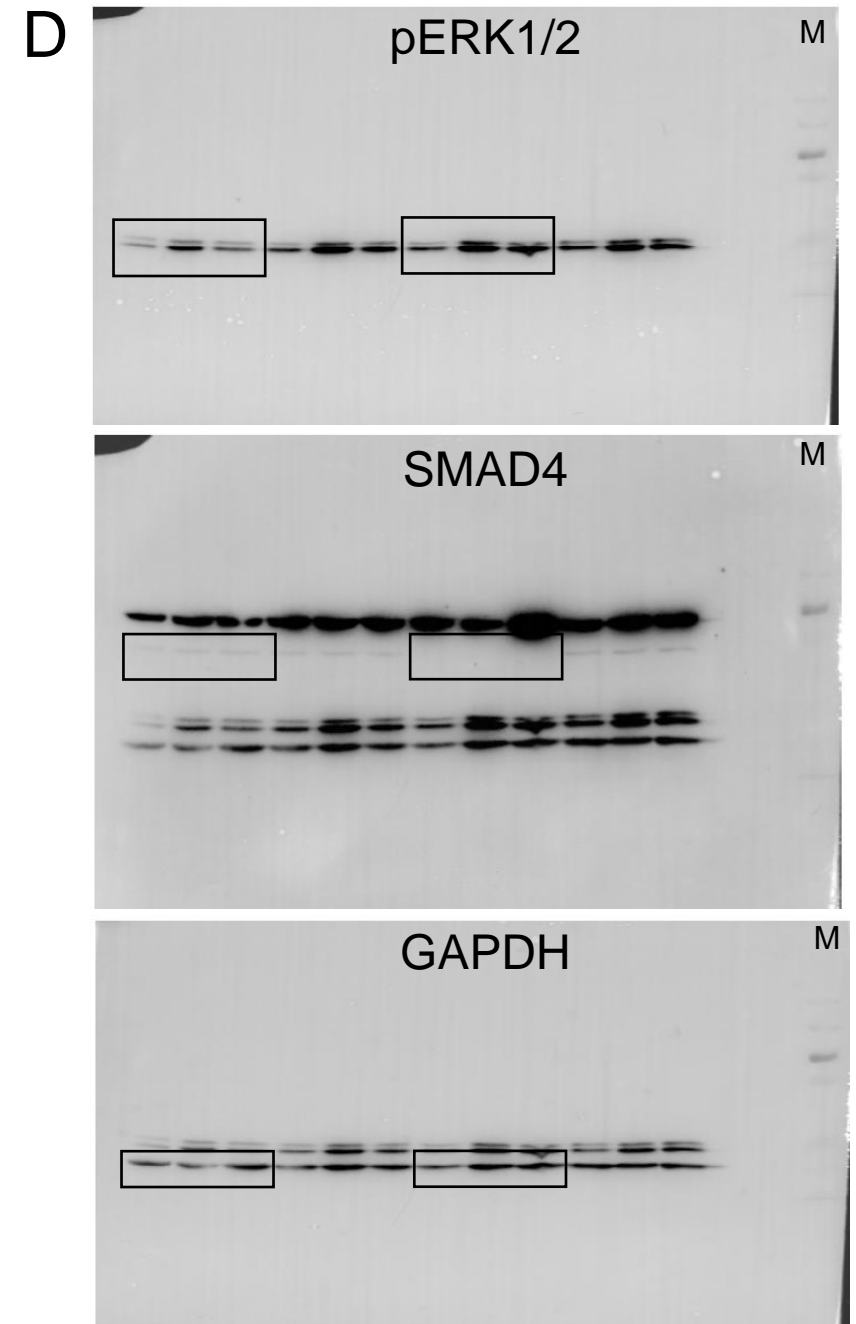

Figure legend: M = molecular weight marker  
(SM1841, Fermentas/Thermo Fisher Scientific)

The boxed bands indicate those in the main figure

# Uncropped blots from Figure S1A

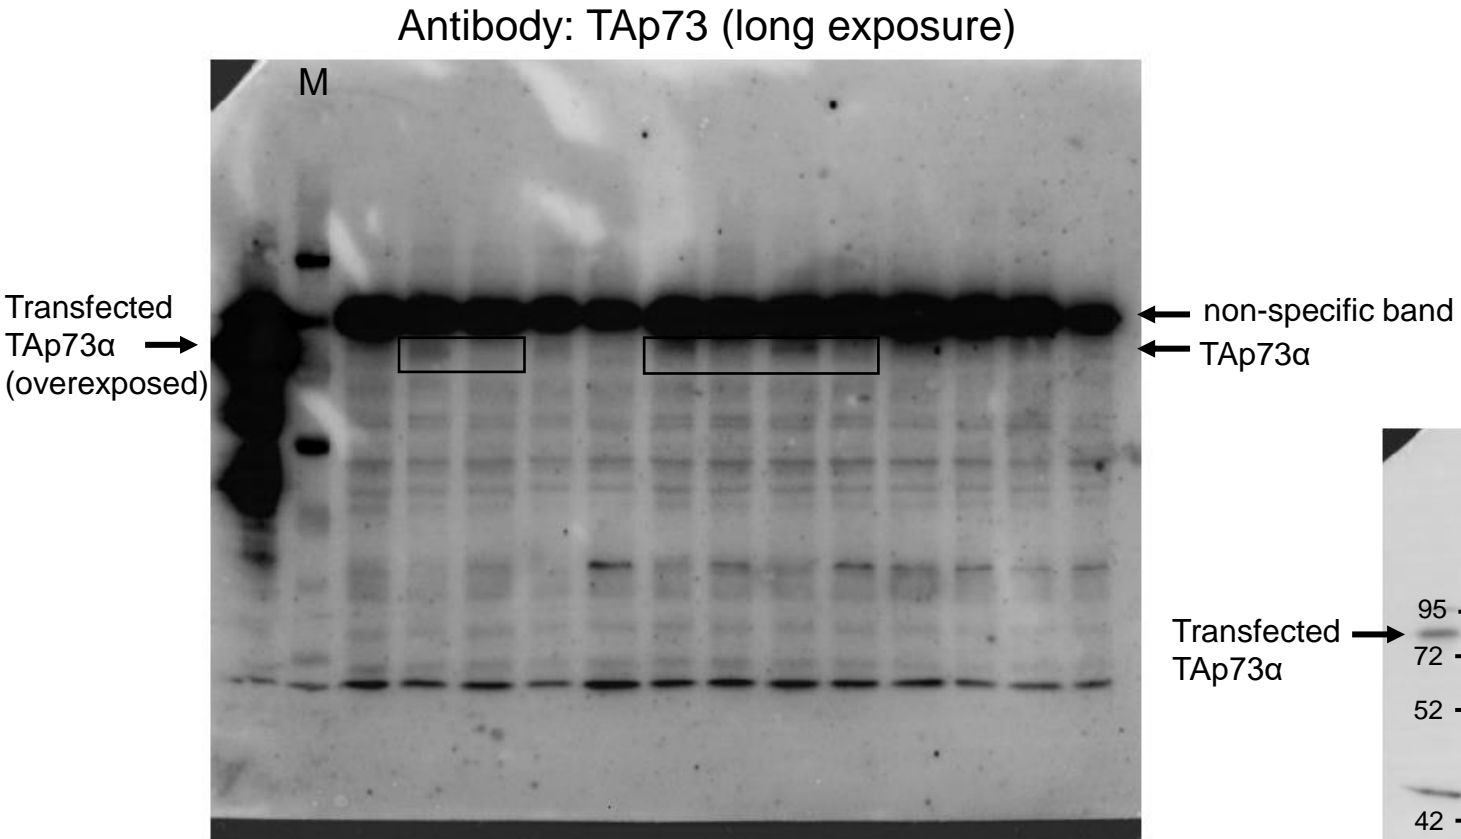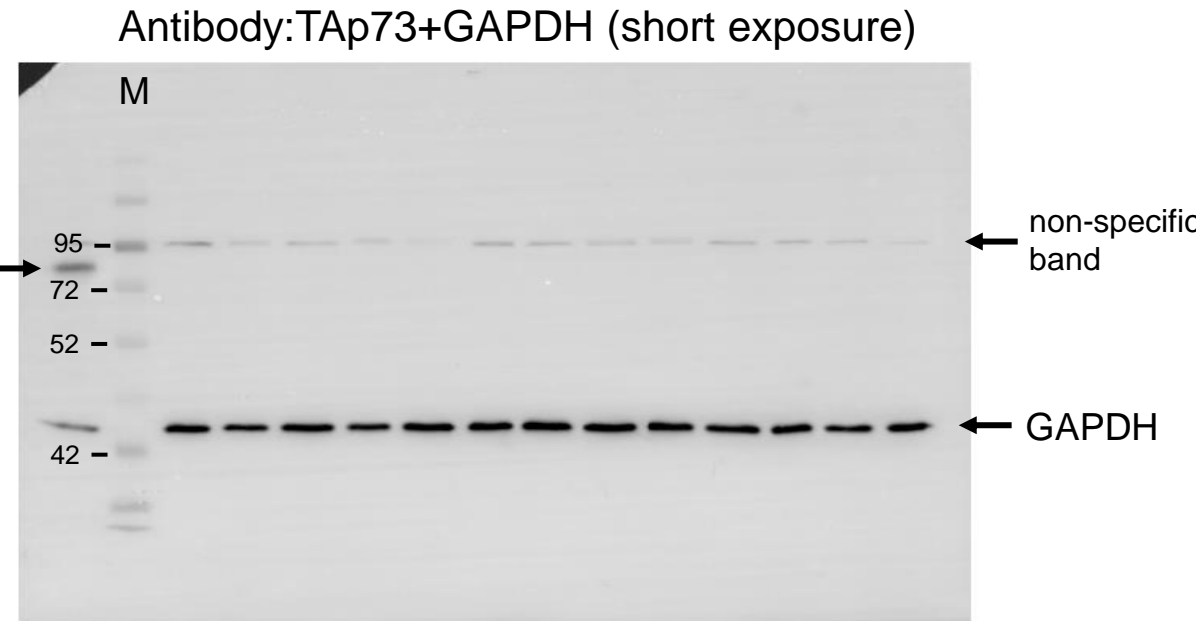

Figure legend: M = molecular weight marker  
(SM1841, Fermentas/Thermo Fisher Scientific)

The boxed bands indicate those in the main figure
